# Supplementary material for: Near-infrared afterglow enhancement of ZnGa2O4:Cr3+via regulating trap distribution guided by the VRBE diagram
Source: Royal Society of Chemistry journal article supplement (doi:10.1039/d4dt01001a), 2024-01-01
Supplement: d4dt01001a1.pdf [file d4dt01001a1.pdf]

## Supporting Information

### Near-infrared afterglow enhancement of $\text{ZnGa}_2\text{O}_4:\text{Cr}^{3+}$ via regulating trap distribution guided by VRBE diagram

Shuyu Huang, Xinxin Han\*, Chuanyu Zeng, Anxian Liang, Bingsuo Zou\*

\*Corresponding authors: xxhan@gxu.edu.cn (X. Han); zoubs@gxu.edu.cn (B. Zou)

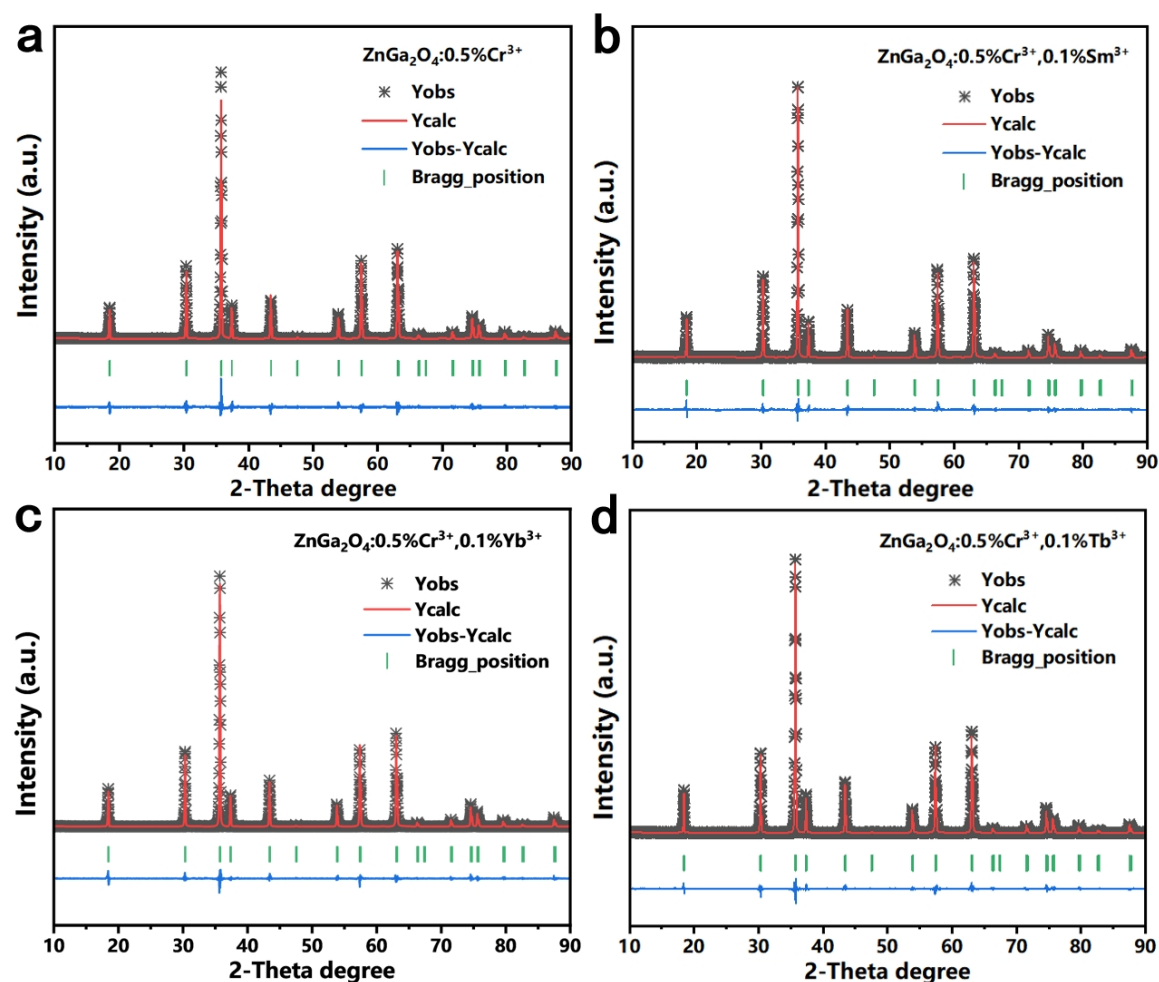

Fig. S1 XRD refinement of (a)  $\text{ZnGa}_2\text{O}_4:0.5\%\text{Cr}^{3+}$ , (b)  $\text{ZnGa}_2\text{O}_4:0.5\%\text{Cr}^{3+},0.1\%\text{Sm}^{3+}$ , (c)  $\text{ZnGa}_2\text{O}_4:0.5\%\text{Cr}^{3+},0.1\%\text{Yb}^{3+}$  and (d)  $\text{ZnGa}_2\text{O}_4:0.5\%\text{Cr}^{3+},0.1\%\text{Tb}^{3+}$ .

**Table S1** XRD refinement results and lattice parameters of  $\text{ZnGa}_2\text{O}_4:0.5\%\text{Cr}^{3+}$  and  $\text{ZnGa}_2\text{O}_4:0.5\%\text{Cr}^{3+},0.1\%\text{Ln}^{3+}(\text{Ln}=\text{Sm},\text{Yb},\text{Tb})$

| Sample                                                            | $a=b=c$ (Å) | $V$ (Å <sup>3</sup> ) | $\alpha=\beta=\gamma$ |
|-------------------------------------------------------------------|-------------|-----------------------|-----------------------|
| $\text{ZnGa}_2\text{O}_4:0.5\%\text{Cr}^{3+}$                     | 8.33852(7)  | 579.785(8)            | 90°                   |
| $\text{ZnGa}_2\text{O}_4:0.5\%\text{Cr}^{3+},0.1\%\text{Sm}^{3+}$ | 8.33512     | 579.075               | 90°                   |
| $\text{ZnGa}_2\text{O}_4:0.5\%\text{Cr}^{3+},0.1\%\text{Yb}^{3+}$ | 8.33761(10) | 579.594(12)           | 90°                   |
| $\text{ZnGa}_2\text{O}_4:0.5\%\text{Cr}^{3+},0.1\%\text{Tb}^{3+}$ | 8.33436     | 578.917               | 90°                   |

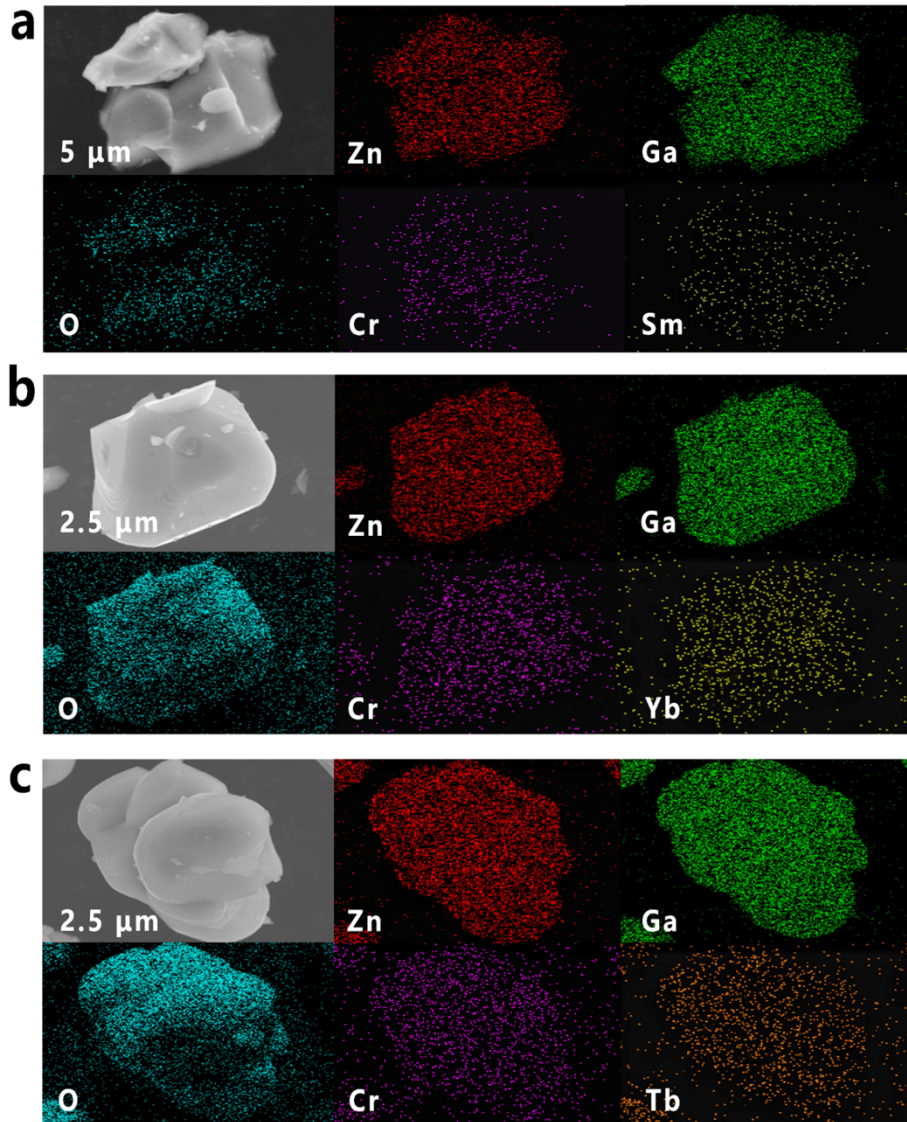

**Fig. S2** SEM image of a single crystal and the corresponding EDS elemental mapping images of (a)  $\text{ZnGa}_2\text{O}_4:0.5\%\text{Cr}^{3+},0.1\%\text{Sm}^{3+}$ . (b)  $\text{ZnGa}_2\text{O}_4:0.5\%\text{Cr}^{3+},0.1\%\text{Yb}^{3+}$ . (c)

ZnGa<sub>2</sub>O<sub>4</sub>:0.5%Cr<sup>3+</sup>,0.1%Tb<sup>3+</sup>

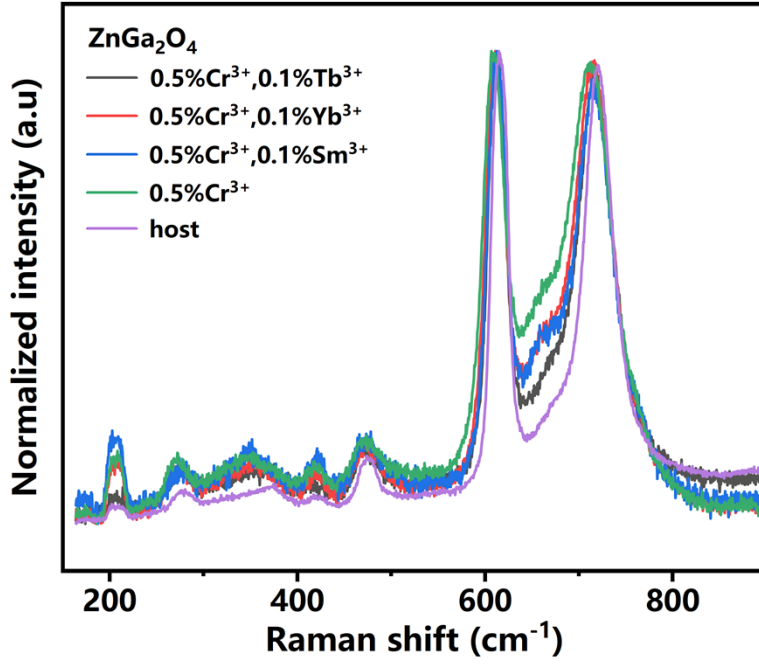

**Fig. S3** Normalized Raman spectra of ZnGa<sub>2</sub>O<sub>4</sub>, ZnGa<sub>2</sub>O<sub>4</sub>:0.5%Cr<sup>3+</sup> and ZnGa<sub>2</sub>O<sub>4</sub>:0.5%Cr<sup>3+</sup>,0.1%Ln<sup>3+</sup>(Ln=Sm,Yb,Tb)

**Table S2** Trap depth and standard deviation of the samples

|                  | Sample 1 (eV) | Sample 2 (eV) | Sample 3 (eV) | Sample 4 (eV) | Standard deviation (eV) |
|------------------|---------------|---------------|---------------|---------------|-------------------------|
| Sm <sup>3+</sup> | 0.720         | 0.726         | 0.730         | 0.724         | 0.004                   |
| Yb <sup>3+</sup> | 0.712         | 0.704         | 0.726         | 0.716         | 0.008                   |
| Tb <sup>3+</sup> | 0.700         | 0.702         | 0.712         | 0.710         | 0.007                   |
| Cr <sup>3+</sup> | 0.690         | 0.692         | 0.711         | 0.696         | 0.008                   |
